# Supplementary material for: Macrokinetic effects in perhydro-N-ethylcarbazole dehydrogenation and H2productivity optimization by using egg-shell catalysts
Source: Royal Society of Chemistry journal article supplement (doi:10.1039/c5ee02024g), 2015-01-01
Supplement: c5ee02024g1.pdf [file c5ee02024g1.pdf]

# Macrokinetic effects in perhydro-N-ethylcarbazole dehydrogenation and H<sub>2</sub> productivity optimization by using egg-shell catalysts

<sup>5</sup> Willi Peters, Alexander Seidel, Stefan Herzog, Andreas Bösmann, Wilhelm Schwieger, Peter Wasserscheid

*Received (in XXX, XXX) Xth XXXXXXXXXX 20XX, Accepted Xth XXXXXXXXXX 20XX*

<sup>10</sup> DOI: 10.1039/b000000x

## Supporting Information

**Table S1 – Detailed data on the conformity of temperature programmed experiments:** Hydrogen flow rate (H<sub>2</sub>-FR), counts (CTS) and standard deviation (STD); Reaction temperature: 220 °C – 261 °C; H12-NEC flow rate: 0.6 mL min<sup>-1</sup>; Catalyst: 44 μm; 30 catalyst spheres; Platinum mass: 1.0 mg.

| Reaction temp. °C | Upward-ramp                             |       |                          | Downward-ramp                           |       |                          | All values                              |       |                          |
|-------------------|-----------------------------------------|-------|--------------------------|-----------------------------------------|-------|--------------------------|-----------------------------------------|-------|--------------------------|
|                   | H <sub>2</sub> -FR mL min <sup>-1</sup> | CTS n | STD mL min <sup>-1</sup> | H <sub>2</sub> -FR mL min <sup>-1</sup> | CTS n | STD mL min <sup>-1</sup> | H <sub>2</sub> -FR mL min <sup>-1</sup> | CTS n | STD mL min <sup>-1</sup> |
| 220               | n/a                                     | n/a   | n/a                      | n/a                                     | n/a   | n/a                      | n/a                                     | n/a   | n/a                      |
| 221               | n/a                                     | n/a   | n/a                      | n/a                                     | n/a   | n/a                      | n/a                                     | n/a   | n/a                      |
| 222               | 11.3                                    | 5     | 1.34                     | 12.0                                    | 3     | 0.36                     | 11.6                                    | 8     | 1.13                     |
| 223               | 12.1                                    | 15    | 1.55                     | 11.8                                    | 17    | 2.15                     | 11.9                                    | 32    | 1.90                     |
| 224               | 12.7                                    | 16    | 2.05                     | 13.9                                    | 21    | 1.49                     | 13.4                                    | 37    | 1.86                     |
| 225               | 13.8                                    | 20    | 1.33                     | 15.3                                    | 15    | 1.35                     | 14.4                                    | 35    | 1.53                     |
| 226               | 14.9                                    | 17    | 1.90                     | 16.8                                    | 18    | 1.42                     | 15.9                                    | 35    | 1.91                     |
| 227               | 16.3                                    | 14    | 1.46                     | 18.6                                    | 33    | 1.33                     | 17.9                                    | 47    | 1.73                     |
| 228               | 18.4                                    | 16    | 1.48                     | 20.8                                    | 25    | 1.66                     | 19.9                                    | 41    | 1.97                     |
| 229               | 20.1                                    | 16    | 1.29                     | 23.2                                    | 16    | 1.29                     | 21.7                                    | 32    | 2.04                     |
| 230               | 21.9                                    | 17    | 1.27                     | 25.1                                    | 18    | 1.37                     | 23.5                                    | 35    | 2.09                     |
| 231               | 23.9                                    | 15    | 1.26                     | 26.8                                    | 14    | 1.18                     | 25.3                                    | 29    | 1.92                     |
| 232               | 25.6                                    | 16    | 0.97                     | 28.7                                    | 13    | 1.32                     | 27.0                                    | 29    | 1.89                     |
| 233               | 28.3                                    | 17    | 1.06                     | 30.2                                    | 17    | 1.13                     | 29.3                                    | 34    | 1.44                     |
| 234               | 30.3                                    | 16    | 1.09                     | 32.0                                    | 16    | 1.03                     | 31.2                                    | 32    | 1.37                     |
| 235               | 32.5                                    | 16    | 1.71                     | 33.9                                    | 20    | 1.32                     | 33.3                                    | 36    | 1.67                     |
| 236               | 34.1                                    | 17    | 1.22                     | 36.8                                    | 14    | 1.70                     | 35.3                                    | 31    | 1.98                     |
| 237               | 36.6                                    | 15    | 1.19                     | 38.1                                    | 18    | 0.81                     | 37.4                                    | 33    | 1.26                     |
| 238               | 38.1                                    | 15    | 1.14                     | 40.3                                    | 12    | 1.02                     | 39.1                                    | 27    | 1.53                     |
| 239               | 40.9                                    | 17    | 1.81                     | 43.1                                    | 20    | 1.49                     | 42.1                                    | 37    | 1.97                     |
| 240               | 42.5                                    | 16    | 1.18                     | 44.9                                    | 17    | 1.50                     | 43.7                                    | 33    | 1.78                     |
| 241               | 45.0                                    | 19    | 1.26                     | 47.0                                    | 14    | 1.71                     | 45.8                                    | 33    | 1.78                     |
| 242               | 47.3                                    | 9     | 0.95                     | 49.1                                    | 18    | 1.43                     | 48.5                                    | 27    | 1.54                     |
| 243               | 49.7                                    | 17    | 1.88                     | 51.4                                    | 15    | 1.70                     | 50.5                                    | 32    | 1.99                     |
| 244               | 52.4                                    | 15    | 1.86                     | 52.8                                    | 14    | 1.16                     | 52.6                                    | 29    | 1.57                     |
| 245               | 54.2                                    | 15    | 1.96                     | 56.0                                    | 19    | 1.64                     | 55.2                                    | 34    | 2.01                     |
| 246               | n/a                                     | n/a   | n/a                      | n/a                                     | n/a   | n/a                      | n/a                                     | n/a   | n/a                      |
| 247               | 56.3                                    | 20    | 2.32                     | 57.7                                    | 19    | 1.33                     | 57.0                                    | 39    | 2.03                     |
| 248               | 59.5                                    | 15    | 1.91                     | 59.2                                    | 11    | 1.39                     | 59.4                                    | 26    | 1.71                     |
| 249               | 62.0                                    | 22    | 1.55                     | 62.3                                    | 19    | 1.89                     | 62.1                                    | 41    | 1.73                     |
| 250               | 64.2                                    | 13    | 1.46                     | 66.1                                    | 18    | 3.14                     | 65.3                                    | 31    | 2.75                     |
| 251               | 66.5                                    | 16    | 1.33                     | 68.2                                    | 15    | 2.17                     | 67.3                                    | 31    | 1.98                     |
| 252               | 69.4                                    | 17    | 1.97                     | 69.1                                    | 19    | 1.49                     | 69.3                                    | 36    | 1.74                     |
| 253               | 71.4                                    | 14    | 1.64                     | 73.6                                    | 16    | 2.28                     | 72.5                                    | 30    | 2.29                     |
| 254               | 73.4                                    | 21    | 2.54                     | 73.9                                    | 18    | 1.04                     | 73.6                                    | 39    | 2.01                     |
| 255               | 77.0                                    | 17    | 3.04                     | 76.0                                    | 15    | 1.45                     | 76.5                                    | 32    | 2.48                     |
| 256               | 79.7                                    | 17    | 2.13                     | 78.9                                    | 18    | 1.41                     | 79.3                                    | 35    | 1.84                     |
| 257               | 81.3                                    | 10    | 0.99                     | 80.8                                    | 16    | 1.47                     | 81.0                                    | 26    | 1.33                     |
| 258               | 82.0                                    | 11    | 1.20                     | 83.2                                    | 20    | 1.89                     | 82.8                                    | 31    | 1.77                     |
| 259               | 86.9                                    | 12    | 3.07                     | 86.1                                    | 13    | 1.46                     | 86.5                                    | 25    | 2.40                     |
| 260               | 86.4                                    | 10    | 1.46                     | 87.5                                    | 11    | 1.24                     | 88.4                                    | 49    | 3.72                     |
| 261               | n/a                                     | n/a   | n/a                      | 90.3                                    | 1     | 0                        | 88.6                                    | 163   | 3.53                     |
